# Supplementary material
Source: MDPI journal article supplement (https://www.mdpi.com/1099-4300/24/2/278)
Supplement: s1 [file s1]

## Supplementary Materials: Approximate Entropy in Canonical and Non-Canonical Fiction

Table S1: List of texts in the Jena Corpus of Expository and Fictional Prose (JEFP Corpus), Version 2.0. Canonical texts were selected from the Corpus of Canonical Western Literature. Non-canonical texts were downloaded from [www.smashwords.com](http://www.smashwords.com), [www.goodreads.com](http://www.goodreads.com), [www.feedbooks.com](http://www.feedbooks.com), or Project Gutenberg. Non-fictional texts were sampled from Project Gutenberg.

|    | Title                                        | Author(s)                   | Year of Publication | Category  |
|----|----------------------------------------------|-----------------------------|---------------------|-----------|
| 1  | Little Dorrit                                | Charles Dickens             | 1857                | Canonical |
| 2  | Oliver Twist                                 | Charles Dickens             | 1839                | Canonical |
| 3  | The Life and Adventures of Nicholas Nickleby | Charles Dickens             | 1839                | Canonical |
| 4  | The Mystery of Edwin Drood                   | Charles Dickens             | 1870                | Canonical |
| 5  | The Pickwick Papers                          | Charles Dickens             | 1836                | Canonical |
| 6  | Jane Eyre                                    | Charlotte Bronte            | 1847                | Canonical |
| 7  | Villette                                     | Charlotte Bronte            | 1853                | Canonical |
| 8  | Cranford                                     | Elizabeth Gaskell           | 1853                | Canonical |
| 9  | Mary Barton                                  | Elizabeth Gaskell           | 1848                | Canonical |
| 10 | North and South                              | Elizabeth Gaskell           | 1854                | Canonical |
| 11 | Agnes Grey                                   | Anne Bronte                 | 1847                | Canonical |
| 12 | Adam Bede                                    | George Eliot                | 1859                | Canonical |
| 13 | Daniel Deronda                               | George Eliot                | 1876                | Canonical |
| 14 | Middlemarch                                  | George Eliot                | 1872                | Canonical |
| 15 | Silas Marner                                 | George Eliot                | 1861                | Canonical |
| 16 | The Mill on the Floss                        | George Eliot                | 1860                | Canonical |
| 17 | Emma                                         | Jane Austen                 | 1815                | Canonical |
| 18 | Mansfield Park                               | Jane Austen                 | 1814                | Canonical |
| 19 | Persuasion                                   | Jane Austen                 | 1818                | Canonical |
| 20 | Pride and Prejudice                          | Jane Austen                 | 1813                | Canonical |
| 21 | The Picture of Dorian Gray                   | Oscar Wilde                 | 1890                | Canonical |
| 22 | The Tenant of Wildfell Hall                  | Anne Bronte                 | 1848                | Canonical |
| 23 | Sartor Resartus                              | Thomas Carlyle              | 1834                | Canonical |
| 24 | Old Mortality                                | Walter Scott                | 1816                | Canonical |
| 25 | Redgauntlet                                  | Walter Scott                | 1824                | Canonical |
| 26 | The Heart of Midlothian                      | Walter Scott                | 1818                | Canonical |
| 27 | Waverley                                     | Walter Scott                | 1814                | Canonical |
| 28 | No Name                                      | Wilkie Collins              | 1862                | Canonical |
| 29 | The Moonstone                                | Wilkie Collins              | 1868                | Canonical |
| 30 | The Woman in White                           | Wilkie Collins              | 1859                | Canonical |
| 31 | The History of Henry Esmond                  | William Makepeace Thackeray | 1852                | Canonical |
| 32 | Vanity Fair                                  | William Makepeace Thackeray | 1847                | Canonical |
| 33 | Dracula                                      | Bram Stoker                 | 1897                | Canonical |
| 34 | The Well at the World's end                  | William Morris              | 1896                | Canonical |
| 35 | The Narrative of Arthur Gordon Pym           | Edgar Allan Poe             | 1838                | Canonical |
| 36 | The Ambassadors                              | Henry James                 | 1903                | Canonical |
| 37 | The Awkward Age                              | Henry James                 | 1899                | Canonical |
| 38 | The Bostonians                               | Henry James                 | 1886                | Canonical |
| 39 | The Golden Bowl                              | Henry James                 | 1904                | Canonical |
| 40 | The Portrait of a Lady                       | Henry James                 | 1881                | Canonical |
| 41 | The Wings of Dove                            | Henry James                 | 1902                | Canonical |
| 42 | Moby Dick                                    | Herman Melville             | 1851                | Canonical |
| 43 | The Deerslayers                              | James Fenimore Cooper       | 1841                | Canonical |
| 44 | A Christmas Carol                            | Charles Dickens             | 1843                | Canonical |
| 45 | Little Women                                 | Louisa May Alcott           | 1868                | Canonical |
| 46 | Puddnhead Wilson                             | Mark Twain                  | 1893                | Canonical |
| 47 | The Adventures of Finn                       | Mark Twain                  | 1884                | Canonical |
| 48 | The Mysterious Stranger                      | Mark Twain                  | 1916                | Canonical |
| 49 | The Marble Faun                              | Nathaniel Hawthorne         | 1859                | Canonical |
| 50 | The Scarlet Letter                           | Nathaniel Hawthorne         | 1850                | Canonical |
| 51 | Walden                                       | Henry David Thoreau         | 1854                | Canonical |
| 52 | A Connecticut Yankee in King Arthurs         | Mark Twain                  | 1889                | Canonical |
| 53 | Babbitt                                      | Sinclair Lewis              | 1922                | Canonical |
| 54 | A Tale of Two Cities                         | Charles Dickens             | 1859                | Canonical |

*Continued on next page*

Table S1 – Continued from previous page

|     | <b>Title</b>                                    | <b>Author(s)</b>                   | <b>Year of Publication</b> | <b>Category</b> |
|-----|-------------------------------------------------|------------------------------------|----------------------------|-----------------|
| 55  | Sister Carrie                                   | Theodore Dreiser                   | 1900                       | Canonical       |
| 56  | My Antonia                                      | Willa Cather                       | 1918                       | Canonical       |
| 57  | The Old Wives Tale                              | Arnold Bennett                     | 1908                       | Canonical       |
| 58  | Portrait of the Artist as a Young Man           | James Joyce                        | 1916                       | Canonical       |
| 59  | Ulysses                                         | James Joyce                        | 1922                       | Canonical       |
| 60  | Lord Jim                                        | Joseph Conrad                      | 1900                       | Canonical       |
| 61  | Nostromo                                        | Joseph Conrad                      | 1904                       | Canonical       |
| 62  | The Secret Agent                                | Joseph Conrad                      | 1907                       | Canonical       |
| 63  | Under Western Eyes                              | Joseph Conrad                      | 1911                       | Canonical       |
| 64  | Victory: An Island Tale                         | Joseph Conrad                      | 1915                       | Canonical       |
| 65  | Bleak House                                     | Charles Dickens                    | 1853                       | Canonical       |
| 66  | The Rainbow                                     | D. H. Lawrence                     | 1915                       | Canonical       |
| 67  | Women in Love                                   | D. H. Lawrence                     | 1920                       | Canonical       |
| 68  | Kim                                             | Rudyard Kipling                    | 1901                       | Canonical       |
| 69  | Puck of Pooks Hill                              | Rudyard Kipling                    | 1906                       | Canonical       |
| 70  | Jude the Obscure                                | Thomas Hardy                       | 1895                       | Canonical       |
| 71  | Tess of the d'Urbervilles                       | Thomas Hardy                       | 1891                       | Canonical       |
| 72  | The Mayor of Casterbridge                       | Thomas Hardy                       | 1886                       | Canonical       |
| 73  | The Return of the Native                        | Thomas Hardy                       | 1878                       | Canonical       |
| 74  | David Copperfield                               | Charles Dickens                    | 1850                       | Canonical       |
| 75  | Great Expectations                              | Charles Dickens                    | 1860                       | Canonical       |
| 76  | Hard Times                                      | Charles Dickens                    | 1854                       | Canonical       |
| 77  | A Prisoner in Fairyland                         | Algernon Blackwood                 | 1913                       | Non-Canonical   |
| 78  | The Centaur                                     | Algernon Blackwood                 | 1911                       | Non-Canonical   |
| 79  | Ruth Fielding at the War Front                  | Alice B. Emerson                   | 1918                       | Non-Canonical   |
| 80  | The International Spy                           | Allen Upward                       | 1904                       | Non-Canonical   |
| 81  | A Texas Matchmaker                              | Andy Adams                         | 1904                       | Non-Canonical   |
| 82  | The Filigree Ball                               | Anna Katharine Green               | 1903                       | Non-Canonical   |
| 83  | Looking Further Backward                        | Arthur Dudley Vinton               | 1890                       | Non-Canonical   |
| 84  | The Hill Of Dreams                              | Arthur Machen                      | 1907                       | Non-Canonical   |
| 85  | Jean of the Lazy A                              | Burton E. Stevenson                | 1915                       | Non-Canonical   |
| 86  | The Gloved Hand                                 | Baroness Emma Orczy                | 1913                       | Non-Canonical   |
| 87  | The Filibusters                                 | Charles John Cutcliffe Wright Hyne | 1900                       | Non-Canonical   |
| 88  | Wunpost                                         | Dane Coolidge                      | 1920                       | Non-Canonical   |
| 89  | Love Insurance                                  | Earl Derr Biggers                  | 1914                       | Non-Canonical   |
| 90  | The Wouldbegoods                                | Edith Nesbit                       | 1899                       | Non-Canonical   |
| 91  | Wet Magic                                       | Edith Nesbit                       | 1913                       | Non-Canonical   |
| 92  | An Amiable Charlatan                            | Edward Phillips Oppenheim          | 1916                       | Non-Canonical   |
| 93  | The Double Traitor                              | Edward Phillips Oppenheim          | 1915                       | Non-Canonical   |
| 94  | The Zeppelin 's Passenger                       | Edward Phillips Oppenheim          | 1918                       | Non-Canonical   |
| 95  | The People of the Ruins                         | Edward Shanks                      | 1920                       | Non-Canonical   |
| 96  | The Honor of the Name                           | Ernest Bramah Smith                | 1891                       | Non-Canonical   |
| 97  | The Riddle of the Sands                         | Eugene Percy Lyle                  | 1903                       | Non-Canonical   |
| 98  | The Missourian                                  | Ford Madox Ford                    | 1905                       | Non-Canonical   |
| 99  | Privy Seal                                      | Frederic Arnold Kummer             | 1907                       | Non-Canonical   |
| 100 | Condemned as a Nihilist                         | Harold MacGrath                    | 1893                       | Non-Canonical   |
| 101 | The Afterglow                                   | George Allan England               | 1913                       | Non-Canonical   |
| 102 | The Flying Legion                               | George Allan England               | 1920                       | Non-Canonical   |
| 103 | West Wind Drift                                 | George Barr McCutcheon             | 1920                       | Non-Canonical   |
| 104 | Trilby                                          | George W. Ogden                    | 1894                       | Non-Canonical   |
| 105 | Olga Romanoff or , The Syren of the Skies       | George F. Worts                    | 1894                       | Non-Canonical   |
| 106 | The Princess and Curdie                         | George Griffith                    | 1883                       | Non-Canonical   |
| 107 | The Adventures of Don Lavington                 | George MacDonald                   | 1896                       | Non-Canonical   |
| 108 | A Voyage to the Moon                            | George Manville Fenn               | 1827                       | Non-Canonical   |
| 109 | Man on the Box                                  | Harold MacGrath                    | 1904                       | Non-Canonical   |
| 110 | The Puppet Crown                                | Homer Eon Flint                    | 1901                       | Non-Canonical   |
| 111 | Men of Iron                                     | Ida Alexa Ross Wylie               | 1891                       | Non-Canonical   |
| 112 | Towards Morning                                 | James Branch Cabell                | 1918                       | Non-Canonical   |
| 113 | A Strange Manuscript Found in a Copper Cylinder | James De Mille                     | 1888                       | Non-Canonical   |
| 114 | Lost in the Fog                                 | James Malcom Rymer                 | 1870                       | Non-Canonical   |
| 115 | Varney the Vampire                              | James Oliver Curwood               | 1847                       | Non-Canonical   |
| 116 | The Danger Trail                                | John Meade Falkner                 | 1910                       | Non-Canonical   |

*Continued on next page*

Table S1 – Continued from previous page

|     | Title                                                                                                                                       | Author(s)                    | Year of Publication | Category      |
|-----|---------------------------------------------------------------------------------------------------------------------------------------------|------------------------------|---------------------|---------------|
| 117 | The Lost Stradivarius                                                                                                                       | John Meade Falkner           | 1895                | Non-Canonical |
| 118 | The Nebuly Coat                                                                                                                             | Joseph Hocking               | 1903                | Non-Canonical |
| 119 | The Weapons of Mystery                                                                                                                      | Joseph Smith Fletcher        | 1890                | Non-Canonical |
| 120 | Diane of the Green Van                                                                                                                      | Lord Dunsany                 | 1914                | Non-Canonical |
| 121 | The Treasure Trail                                                                                                                          | Mary E. Bradley              | 1918                | Non-Canonical |
| 122 | Mizora : A Prophecy                                                                                                                         | Mary Roberts Rinehart        | 1889                | Non-Canonical |
| 123 | Across the Zodiac                                                                                                                           | Percy Greg                   | 1880                | Non-Canonical |
| 124 | Bardelys the Magnificent                                                                                                                    | Rafael Sabatini              | 1905                | Non-Canonical |
| 125 | Soldiers of Fortune                                                                                                                         | Richard Harding Davis        | 1897                | Non-Canonical |
| 126 | The Beetle                                                                                                                                  | Richard Marsh                | 1897                | Non-Canonical |
| 127 | The Triumphs of Eugne Valmont                                                                                                               | Robert Barr                  | 1906                | Non-Canonical |
| 128 | Erling the Bold                                                                                                                             | Robert Michael Ballantyne    | 1869                | Non-Canonical |
| 129 | The Dog Crusoe and His Master                                                                                                               | Robert Michael Ballantyne    | 1894                | Non-Canonical |
| 130 | Ailsa Paige                                                                                                                                 | Robert William Chambers      | 1910                | Non-Canonical |
| 131 | In Search of the Unknown                                                                                                                    | Robert William Chambers      | 1904                | Non-Canonical |
| 132 | In the Quarter                                                                                                                              | Robert William Chambers      | 1894                | Non-Canonical |
| 133 | Erewhon , or Over The Range                                                                                                                 | Samuel Butler                | 1910                | Non-Canonical |
| 134 | The road to Frontenac                                                                                                                       | Samuel Merwin                | 1901                | Non-Canonical |
| 135 | The Revolt of Man                                                                                                                           | Sir Walter Besant            | 1882                | Non-Canonical |
| 136 | The Brass Bottle                                                                                                                            | Thomas Anstey Guthrie        | 1900                | Non-Canonical |
| 137 | The Doomsman                                                                                                                                | Van Tassel Sutphen           | 1906                | Non-Canonical |
| 138 | The Border Legion                                                                                                                           | Zane Grey                    | 1916                | Non-Canonical |
| 139 | The Daltons; Or, Three Roads In Life. Volume I (of II)                                                                                      | Charles James Lever          | 1850                | Non-Canonical |
| 140 | Melmoth the Wanderer, Vol. 3                                                                                                                | Charles Robert Maturin       | 1820                | Non-Canonical |
| 141 | Melmoth the Wanderer, Vol. 2                                                                                                                | Charles Robert Maturin       | 1820                | Non-Canonical |
| 142 | The Wanderer; or, Female Difficulties (Volume 4 of 5)                                                                                       | Fanny Burney                 | 1814                | Non-Canonical |
| 143 | The Wanderer; or, Female Difficulties (Volume 2 of 5)                                                                                       | Fanny Burney                 | 1814                | Non-Canonical |
| 144 | The Wanderer; or, Female Difficulties (Volume 3 of 5)                                                                                       | Fanny Burney                 | 1814                | Non-Canonical |
| 145 | The Vicar of Wrexhill                                                                                                                       | Frances Milton Trollope      | 1837                | Non-Canonical |
| 146 | The Fortunes of the Colville Family; or, A Cloud with its Silver Lining                                                                     | Frank Edward Smedley         | 1853                | Non-Canonical |
| 147 | Harry Coverdale's Courtship, and All That Came of It                                                                                        | Frank Edward Smedley         | 1854                | Non-Canonical |
| 148 | Lewis Arundel; Or, The Railroad Of Life                                                                                                     | Frank Edward Smedley         | 1852                | Non-Canonical |
| 149 | The Little Savage                                                                                                                           | Frederick Marryat            | 1848                | Non-Canonical |
| 150 | Newton Forster                                                                                                                              | Frederick Marryat            | 1832                | Non-Canonical |
| 151 | Snarleygaw; or, The Dog Fiend                                                                                                               | Frederick Marryat            | 1837                | Non-Canonical |
| 152 | Travels and Adventures of Monsieur Violet                                                                                                   | Frederick Marryat            | 1843                | Non-Canonical |
| 153 | The Privateer's-Man, One hundred Years Ago                                                                                                  | Frederick Marryat            | 1846                | Non-Canonical |
| 154 | The Little Savage                                                                                                                           | Frederick Marryat            | 1848                | Non-Canonical |
| 155 | Snarleygaw, or, the Dog Fiend                                                                                                               | Frederick Marryat            | 1837                | Non-Canonical |
| 156 | Newton Forster; Or, The Merchant Service                                                                                                    | Frederick Marryat            | 1832                | Non-Canonical |
| 157 | Mr. Midshipman Easy                                                                                                                         | Frederick Marryat            | 1836                | Non-Canonical |
| 158 | Arrah Neil; or, Times of Old                                                                                                                | George Payne Rainsford James | 1843                | Non-Canonical |
| 159 | The Castle of Ehrenstein: Its Lords Spiritual and Temporal; Its Inhabitants Earthly and Unearthly                                           | George Payne Rainsford James | 1847                | Non-Canonical |
| 160 | Forest Days: A Romance of Old Times                                                                                                         | George Payne Rainsford James | 1843                | Non-Canonical |
| 161 | A Voyage to the Moon: With Some Account of the Manners and Customs, Science and Philosophy, of the People of Morosofia, and Other Lunarians | George Tucker                | 1827                | Non-Canonical |
| 162 | Market Harborough, and Inside the Bar                                                                                                       | George John Whyte-Melville   | 1858                | Non-Canonical |
| 163 | The Gladiators. A Tale of Rome and Judæa                                                                                                    | George John Whyte-Melville   | 1863                | Non-Canonical |
| 164 | The Mother's Recompense, Volume 2: A Sequel to Home Influence                                                                               | Grace Aguilar                | 1874                | Non-Canonical |
| 165 | The Mother's Recompense, Volume 1: A Sequel to Home Influence                                                                               | Grace Aguilar                | 1874                | Non-Canonical |
| 166 | The Vale of Cedars; Or, The Martyr                                                                                                          | Grace Aguilar                | 1850                | Non-Canonical |
| 167 | Jasper Lyle                                                                                                                                 | Mary Augusta Ward            | 1851                | Non-Canonical |
| 168 | The Eskdale Herd-boy: A Scottish Tale for the Instruction and Amusement of Young People                                                     | Martha Blackford             | 1819                | Non-Canonical |
| 169 | Mary Erskine                                                                                                                                | Jacob Abbott                 | 1850                | Non-Canonical |
| 170 | Bruno; or, lessons of fidelity, patience, and self-denial taught by a dog                                                                   | Jacob Abbott                 | 1854                | Non-Canonical |
| 171 | Rollo in Rome                                                                                                                               | Jacob Abbott                 | 1858                | Non-Canonical |

*Continued on next page*

Table S1 – Continued from previous page

|     | Title                                                                                                                                                                                                                     | Author(s)                       | Year of Publication | Category      |
|-----|---------------------------------------------------------------------------------------------------------------------------------------------------------------------------------------------------------------------------|---------------------------------|---------------------|---------------|
| 172 | Rollo in London                                                                                                                                                                                                           | Jacob Abbott                    | 1850                | Non-Canonical |
| 173 | Among the Brigands                                                                                                                                                                                                        | James De Mille                  | 1871                | Non-Canonical |
| 174 | The Lily and the Cross: A Tale of Acadia                                                                                                                                                                                  | James De Mille                  | 1875                | Non-Canonical |
| 175 | Fire in the Woods: Illustrated                                                                                                                                                                                            | James De Mille                  | 1872                | Non-Canonical |
| 176 | Cord and Creese                                                                                                                                                                                                           | James De Mille                  | 1869                | Non-Canonical |
| 177 | The Three Perils of Man; or, War, Women, and Witchcraft, Vol. 3 (of 3)                                                                                                                                                    | James Hogg                      | 1822                | Non-Canonical |
| 178 | The Three Perils of Man; or, War, Women, and Witchcraft, Vol. 2 (of 3)                                                                                                                                                    | James Hogg                      | 1822                | Non-Canonical |
| 179 | The Provost                                                                                                                                                                                                               | John Galt                       | 1822                | Non-Canonical |
| 180 | Ringan Gilhaize, or, The Covenanters                                                                                                                                                                                      | John Galt                       | 1823                | Non-Canonical |
| 181 | Valerius. A Roman Story                                                                                                                                                                                                   | John Gibson Lockhart            | 1821                | Non-Canonical |
| 182 | The Manoeuvring Mother (vol. 3 of 3)                                                                                                                                                                                      | Lady Charlotte Susan Maria Bury | 1842                | Non-Canonical |
| 183 | The Manoeuvring Mother (vol. 2 of 3)                                                                                                                                                                                      | Lady Charlotte Susan Maria Bury | 1842                | Non-Canonical |
| 184 | The Manoeuvring Mother (vol. 1 of 3)                                                                                                                                                                                      | Lady Charlotte Susan Maria Bury | 1842                | Non-Canonical |
| 185 | The Annals of the Poor                                                                                                                                                                                                    | Legh Richmond                   | 1814                | Non-Canonical |
| 186 | Aunt Kitty's Tales                                                                                                                                                                                                        | Maria Jane McIntosh             | 1847                | Non-Canonical |
| 187 | Camperdown; or, News from our neighbourhood                                                                                                                                                                               | Mary Griffith                   | 1836                | Non-Canonical |
| 188 | The Actress' Daughter: A Novel                                                                                                                                                                                            | May Agnes Fleming               | 1879                | Non-Canonical |
| 189 | Emilie the Peacemaker                                                                                                                                                                                                     | Mrs. Thomas Geldart             | 1851                | Non-Canonical |
| 190 | The Old Church Clock                                                                                                                                                                                                      | Richard Parkinson               | 1843                | Non-Canonical |
| 191 | Sheppard Lee, Written by Himself. Vol. 1 (of 2)                                                                                                                                                                           | Robert Montgomery Bird          | 1836                | Non-Canonical |
| 192 | The Young Trail Hunters: Or, the Wild Riders of the Plains. The Veritable Adventures of Hal Hyde and Ned Brown, on Their Journey Across the Great Plains of the South-West                                                | Samuel Woodworth Cozzens        | 1876                | Non-Canonical |
| 193 | Watch—Work—Wait: Or, The Orphan's Victory                                                                                                                                                                                 | Sarah Ann Myers                 | 1859                | Non-Canonical |
| 194 | Pine Needles                                                                                                                                                                                                              | Susan Bogert Warner             | 1877                | Non-Canonical |
| 195 | Confession; Or, The Blind Heart. A Domestic Story                                                                                                                                                                         | William Gilmore Simms           | 1841                | Non-Canonical |
| 196 | Antony Waymouth; Or, The Gentlemen Adventurers                                                                                                                                                                            | William Henry Giles Kingston    | 1865                | Non-Canonical |
| 197 | Clara Maynard; Or, The True and the False: A Tale of the Times                                                                                                                                                            | William Henry Giles Kingston    | 1877                | Non-Canonical |
| 198 | The Story of Nelson: also "The Grateful Indian", "The Boatswain's Son"                                                                                                                                                    | William Henry Giles Kingston    | 1860                | Non-Canonical |
| 199 | Off to Sea: The Adventures of Jovial Jack Junker on his Road to Fame                                                                                                                                                      | William Henry Giles Kingston    | 1870                | Non-Canonical |
| 200 | Fred Markham in Russia; Or, The Boy Travellers in the Land of the Czar                                                                                                                                                    | William Henry Giles Kingston    | 1858                | Non-Canonical |
| 201 | In New Granada; Or, Heroes and Patriots                                                                                                                                                                                   | William Henry Giles Kingston    | 1879                | Non-Canonical |
| 202 | Roger Kyffin's Ward                                                                                                                                                                                                       | William Henry Giles Kingston    | 1874                | Non-Canonical |
| 203 | Caxton's Book: A Collection of Essays, Poems, Tales, and Sketches.                                                                                                                                                        | William Henry Rhodes            | 1876                | Non-Canonical |
| 204 | Blue-Stocking Hall, (Vol. 2 of 3)                                                                                                                                                                                         | William Pitt Scargill           | 1827                | Non-Canonical |
| 205 | Blue-Stocking Hall, (Vol. 3 of 3)                                                                                                                                                                                         | William Pitt Scargill           | 1827                | Non-Canonical |
| 206 | Aurelian; or, Rome in the Third Century                                                                                                                                                                                   | William Ware                    | 1838                | Non-Canonical |
| 207 | Scottish Cathedrals and Abbeys                                                                                                                                                                                            | Dugald Butler                   | 1901                | Non-Fictional |
| 208 | A Text-Book of the History of Architecture: Seventh Edition, revised                                                                                                                                                      | Alfred Dwight Foster Hamlin     | 1896                | Non-Fictional |
| 209 | Japanese Homes and Their Surroundings                                                                                                                                                                                     | Edward Sylvester Morse          | 1885                | Non-Fictional |
| 210 | The Architecture of Provence and the Riviera                                                                                                                                                                              | David MacGibbon                 | 1888                | Non-Fictional |
| 211 | Historic Ornament, Vol. 2 (of 2): Treatise on decorative art and architectural ornament                                                                                                                                   | James Ward                      | 1897                | Non-Fictional |
| 212 | How to Study Architecture                                                                                                                                                                                                 | Charles Henry Caffin            | 1917                | Non-Fictional |
| 213 | A Dictionary of Slang, Cant, and Vulgar Words: Used at the Present Day in the Streets of London; the Universities of Oxford and Cambridge; the Houses of Parliament; the Dens of St. Giles; and the Palaces of St. James. | John Camden Hotten              | 1860                | Non-Fictional |
| 214 | THE ENCYCLOPAEDIA BRITANNICA-Vol 1                                                                                                                                                                                        | University of Cambridge         | 1910                | Non-Fictional |
| 215 | THE ENCYCLOPAEDIA BRITANNICA-Vol 2                                                                                                                                                                                        | University of Cambridge         | 1910                | Non-Fictional |
| 216 | Through the Brazilian Wilderness                                                                                                                                                                                          | Theodore Roosevelt              | 1914                | Non-Fictional |

Continued on next page

Table S1 – Continued from previous page

|     | Title                                                                                                                                                                                                                                     | Author(s)                                                            | Year of Publication | Category      |
|-----|-------------------------------------------------------------------------------------------------------------------------------------------------------------------------------------------------------------------------------------------|----------------------------------------------------------------------|---------------------|---------------|
| 217 | Gold, Sport, and Coffee Planting in Mysore: With chapters on coffee planting in Coorg, the Mysore representative assembly, the Indian congress, caste and the Indian silver question, being the 38 years' experiences of a Mysore planter | Robert Henry Elliot                                                  | 1898                | Non-Fictional |
| 218 | The Economic Aspect of Geology                                                                                                                                                                                                            | Charles Kenneth Leith                                                | 1921                | Non-Fictional |
| 219 | The Shores of the Adriatic: The Austrian Side, The Küstenlande, Istria, and Dalmatia                                                                                                                                                      | Frederick Hamilton Jackson                                           | 1906                | Non-Fictional |
| 220 | Island Life; Or, The Phenomena and Causes of Insular Faunas and Floras                                                                                                                                                                    | Alfred Russel Wallace                                                | 1880                | Non-Fictional |
| 221 | Sea and Sardinia                                                                                                                                                                                                                          | David Herbert Lawrence                                               | 1921                | Non-Fictional |
| 222 | Sketches from the Subject and Neighbour Lands of Venice                                                                                                                                                                                   | Edward Augustus Freeman                                              | 1881                | Non-Fictional |
| 223 | The Principles of Stratigraphical Geology                                                                                                                                                                                                 | John Edward Marr                                                     | 1898                | Non-Fictional |
| 224 | Babylonian and Assyrian Laws, Contracts and Letters                                                                                                                                                                                       | Claude Hermann Walter Johns                                          | 1904                | Non-Fictional |
| 225 | Putnam's Handy Law Book for the Layman                                                                                                                                                                                                    | Albert Sidney Bolles                                                 | 1921                | Non-Fictional |
| 226 | Marriage and Divorce Laws of the World                                                                                                                                                                                                    | Hyacinthe Ringrose                                                   | 1911                | Non-Fictional |
| 227 | The Law and the Poor                                                                                                                                                                                                                      | Sir Edward Abbott Parry                                              | 1914                | Non-Fictional |
| 228 | International Law                                                                                                                                                                                                                         | George Grafton Wilson, George Fox Tucker                             | 1901                | Non-Fictional |
| 229 | The Criminal Prosecution and Capital Punishment of Animals                                                                                                                                                                                | Edward Payson Evans                                                  | 1906                | Non-Fictional |
| 230 | The English Constitution                                                                                                                                                                                                                  | Walter Bagehot                                                       | 1867                | Non-Fictional |
| 231 | The Law of the Sea: A manual of the principles of admiralty law for students, mariners, and ship operators                                                                                                                                | George L. Canfield, George W. Dalzell, J. Y. Brinton                 | 1921                | Non-Fictional |
| 232 | Woman and the Republic: A Survey of the Woman-Suffrage Movement in the United States and a Discussion of the Claims and Arguments of Its Foremost Advocates                                                                               | Helen Kendrick Johnson                                               | 1897                | Non-Fictional |
| 233 | The American Judiciary                                                                                                                                                                                                                    | Simeon Eben Baldwin                                                  | 1905                | Non-Fictional |
| 234 | A Practical Physiology: A Text-Book for Higher Schools                                                                                                                                                                                    | Albert Franklin Blaisdell                                            | 1897                | Non-Fictional |
| 235 | Amusements in Mathematics                                                                                                                                                                                                                 | Henry Ernest Dudeney                                                 | 1917                | Non-Fictional |
| 236 | On the Genesis of Species                                                                                                                                                                                                                 | St. George Jackson Mivart                                            | 1871                | Non-Fictional |
| 237 | Great Astronomers                                                                                                                                                                                                                         | Robert Stawell Ball                                                  | 1895                | Non-Fictional |
| 238 | Evolution, Old & New: Or, the Theories of Buffon, Dr. Erasmus Darwin and Lamarck; as compared with that of Charles Darwin                                                                                                                 | Samuel Butler                                                        | 1879                | Non-Fictional |
| 239 | Darwin, and After Darwin, Volumes 1 and 3: An Exposition of the Darwinian Theory and a Discussion of Post-Darwinian Questions                                                                                                             | George John Romanes                                                  | 1892                | Non-Fictional |
| 240 | Creative Evolution                                                                                                                                                                                                                        | Henri Bergson                                                        | 1907                | Non-Fictional |
| 241 | Myths and Marvels of Astronomy                                                                                                                                                                                                            | Richard Anthony Proctor                                              | 1877                | Non-Fictional |
| 242 | A Popular History of Astronomy During the Nineteenth Century: Fourth Edition                                                                                                                                                              | Agnes Mary AClerke                                                   | 1887                | Non-Fictional |
| 243 | A Text-Book of Astronomy                                                                                                                                                                                                                  | George Cary Comstock                                                 | 1901                | Non-Fictional |
| 244 | Astronomical Myths: Based on Flammarion's History of the Heavens                                                                                                                                                                          | Camille Flammarion, John Frederick Blake                             | 1877                | Non-Fictional |
| 245 | Darwin, and After Darwin, Volume 2 of 3: Post-Darwinian Questions: Heredity and Utility                                                                                                                                                   | George John Romanes                                                  | 1892                | Non-Fictional |
| 246 | A Civic Biology, Presented in Problems                                                                                                                                                                                                    | George William Hunter                                                | 1914                | Non-Fictional |
| 247 | Physics                                                                                                                                                                                                                                   | Willis E. Tower, Charles M. Turton, Charles H. Smith, Thomas D. Cope | 1920                | Non-Fictional |
| 248 | A Century of Science, and Other Essays                                                                                                                                                                                                    | John Fiske                                                           | 1899                | Non-Fictional |
| 249 | Side-Lights on Astronomy and Kindred Fields of Popular Science                                                                                                                                                                            | Simon Newcomb                                                        | 1906                | Non-Fictional |
| 250 | Elementary Zoology, Second Edition                                                                                                                                                                                                        | Vernon Lyman Kellogg                                                 | 1901                | Non-Fictional |
| 251 | Experiments on Animals                                                                                                                                                                                                                    | Stephen Paget                                                        | 1888                | Non-Fictional |
| 252 | The Sea-beach at Ebb-tide: A Guide to the Study of the Seaweeds and the Lower Animal Life Found Between Tide-marks                                                                                                                        | Augusta Foote Arnold                                                 | 1901                | Non-Fictional |
| 253 | The Science and Philosophy of the Organism                                                                                                                                                                                                | Hans Driesch                                                         | 1908                | Non-Fictional |

*Continued on next page*

Table S1 – Continued from previous page

|     | <b>Title</b>                                                                                                                                                                                                               | <b>Author(s)</b>             | <b>Year of Publication</b> | <b>Category</b> |
|-----|----------------------------------------------------------------------------------------------------------------------------------------------------------------------------------------------------------------------------|------------------------------|----------------------------|-----------------|
| 254 | The Organism as a Whole, from a Physicochemical Viewpoint                                                                                                                                                                  | Jacques Loeb                 | 1916                       | Non-Fictional   |
| 255 | A Guide to the Study of Fishes, Volume 1 (of 2)                                                                                                                                                                            | David Starr Jordan           | 1905                       | Non-Fictional   |
| 256 | Evolution: Its nature, its evidence, and its relation to religious thought                                                                                                                                                 | Joseph LeConte               | 1888                       | Non-Fictional   |
| 257 | The Races of Man: An Outline of Anthropology and Ethnography                                                                                                                                                               | Joseph Deniker               | 1900                       | Non-Fictional   |
| 258 | Observations of a Naturalist in the Pacific Between 1896 and 1899, Volume 1: Vanua Levu, Fiji                                                                                                                              | Henry Brougham Guppy         | 1903                       | Non-Fictional   |
| 259 | Animal Life and Intelligence                                                                                                                                                                                               | Conwy Lloyd Morgan           | 1890                       | Non-Fictional   |
| 260 | Stargazing: Past and Present                                                                                                                                                                                               | Sir Joseph Norman Lockyer    | 1878                       | Non-Fictional   |
| 261 | Observations of a Naturalist in the Pacific Between 1896 and 1899, Volume 2: Plant-Dispersal                                                                                                                               | Henry Brougham Guppy         | 1903                       | Non-Fictional   |
| 262 | The Logic of Chance, 3rd edition: An Essay on the Foundations and Province of the Theory of Probability, With Especial Reference to Its Logical Bearings and Its Application to Moral and Social Science and to Statistics | John Venn                    | 1888                       | Non-Fictional   |
| 263 | Biology and Its Makers: With Portraits and Other Illustrations                                                                                                                                                             | William Albert Locy          | 1908                       | Non-Fictional   |
| 264 | The Crayfish: An Introduction to the Study of Zoology.                                                                                                                                                                     | Thomas Henry Huxley          | 1880                       | Non-Fictional   |
| 265 | History of Botany (1530-1860)                                                                                                                                                                                              | Julius Sachs                 | 1875                       | Non-Fictional   |
| 266 | The Universal Kinship                                                                                                                                                                                                      | John Howard Moore            | 1906                       | Non-Fictional   |
| 267 | The philosophy of biology                                                                                                                                                                                                  | James Johnstone              | 1914                       | Non-Fictional   |
| 268 | Hygienic Physiology : with Special Reference to the Use of Alcoholic Drinks and Narcotics                                                                                                                                  | Joel Dorman Steele           | 1884                       | Non-Fictional   |
| 269 | Species and Varieties, Their Origin by Mutation                                                                                                                                                                            | Hugo de Vries                | 1905                       | Non-Fictional   |
| 270 | The Naturalist in La Plata                                                                                                                                                                                                 | William Henry Hudson         | 1892                       | Non-Fictional   |
| 271 | Studies in the Psychology of Sex, Volume 1: The Evolution of Modesty; The Phenomena of Sexual Periodicity; Auto-Erotism                                                                                                    | Havelock Ellis               | 1900                       | Non-Fictional   |
| 272 | Studies in the Psychology of Sex, Volume 2: Sexual Inversion                                                                                                                                                               | Havelock Ellis               | 1900                       | Non-Fictional   |
| 273 | The Mind of the Child, Part II: The Development of the Intellect, International Education; Series Edited By William T. Harris, Volume IX.                                                                                  | William T. Preyer            | 1888                       | Non-Fictional   |
| 274 | The Measurement of Intelligence: An Explanation of and a Complete Guide for the Use of the; Stanford Revision and Extension of the Binet-Simon; Intelligence Scale                                                         | Lewis Madison Terman         | 1916                       | Non-Fictional   |
| 275 | Human Traits and their Social Significance                                                                                                                                                                                 | Irwin Edman                  | 1919                       | Non-Fictional   |
| 276 | Human Personality and Its Survival of Bodily Death                                                                                                                                                                         | Frederic William Henry Myers | 1903                       | Non-Fictional   |
| 277 | Mysterious Psychic Forces: An Account of the Author's Investigations in Psychical Research, Together with Those of Other European Savants                                                                                  | Camille Flammarion           | 1907                       | Non-Fictional   |
| 278 | The Group Mind: A Sketch of the Principles of Collective Psychology: With Some Attempt to Apply Them to the Interpretation of National Life and Character                                                                  | William McDougall            | 1920                       | Non-Fictional   |
| 279 | On the State of Lunacy and the Legal Provision for the Insane: With Observations on the Construction and Organization of Asylums                                                                                           | John Thomas Arlidge          | 1859                       | Non-Fictional   |
| 280 | The Criminal                                                                                                                                                                                                               | Havelock Ellis               | 1890                       | Non-Fictional   |
| 281 | Fact and Fable in Psychology                                                                                                                                                                                               | Joseph Jastrow               | 1900                       | Non-Fictional   |
| 282 | A Beginner's Psychology                                                                                                                                                                                                    | Edward Bradford Titchener    | 1915                       | Non-Fictional   |
| 283 | The Law of Psychic Phenomena: A working hypothesis for the systematic study of hypnotism, spiritism, mental therapeutics, etc.                                                                                             | Thomson Jay Hudson           | 1893                       | Non-Fictional   |
| 284 | Psychology: Briefer Course                                                                                                                                                                                                 | William James                | 1892                       | Non-Fictional   |
| 285 | The Principles of Psychology, Volume 1 (of 2)                                                                                                                                                                              | William James                | 1890                       | Non-Fictional   |
| 286 | The Principles of Psychology, Volume 2 (of 2)                                                                                                                                                                              | William James                | 1890                       | Non-Fictional   |
| 287 | Browning as a Philosophical and Religious Teacher                                                                                                                                                                          | Sir Jones, Henry             | 1891                       | Non-Fictional   |
| 288 | The Life of Reason: The Phases of Human Progress                                                                                                                                                                           | George Santayana             | 1905                       | Non-Fictional   |
| 289 | An Introduction to Philosophy                                                                                                                                                                                              | George Stuart Fullerton      | 1906                       | Non-Fictional   |
| 290 | The Approach to Philosophy                                                                                                                                                                                                 | Ralph Barton Perry           | 1905                       | Non-Fictional   |

Continued on next page

Table S1 – Continued from previous page

|     | Title                                                                                                                                                                                                              | Author(s)                          | Year of Publication | Category      |
|-----|--------------------------------------------------------------------------------------------------------------------------------------------------------------------------------------------------------------------|------------------------------------|---------------------|---------------|
| 291 | The Will to Believe, and Other Essays in Popular Philosophy                                                                                                                                                        | William James                      | 1896                | Non-Fictional |
| 292 | Christianity and Greek Philosophy: or, the relation between spontaneous and reflective thought in Greece and the positive teaching of Christ and His Apostles                                                      | Benjamin Franklin Cocker           | 1870                | Non-Fictional |
| 293 | A History of Mediaeval Jewish Philosophy                                                                                                                                                                           | Isaac Husik                        | 1916                | Non-Fictional |
| 294 | The Philosophy of Friedrich Nietzsche                                                                                                                                                                              | Henry Louis Mencken                | 1908                | Non-Fictional |
| 295 | Philosophical Studies                                                                                                                                                                                              | George Edward Moore                | 1883                | Non-Fictional |
| 296 | What Nietzsche Taught                                                                                                                                                                                              | Willard Huntington Wright          | 1915                | Non-Fictional |
| 297 | An ethical philosophy of life presented in its main outlines                                                                                                                                                       | Felix Adler                        | 1918                | Non-Fictional |
| 298 | A Beginner's History of Philosophy, Vol. 1: Ancient and Medieval Philosophy                                                                                                                                        | Herbert Ernest Cushman             | 1910                | Non-Fictional |
| 299 | Towards the Great Peace                                                                                                                                                                                            | Ralph Adams Cram                   | 1922                | Non-Fictional |
| 300 | Criminal Man, According to the Classification of Cesare Lombroso                                                                                                                                                   | Gina Lombroso                      | 1880                | Non-Fictional |
| 301 | Criminal Sociology                                                                                                                                                                                                 | Enrico Ferri                       | 1895                | Non-Fictional |
| 302 | Community Civics and Rural Life                                                                                                                                                                                    | Arthur William Dunn                | 1920                | Non-Fictional |
| 303 | Sociology and Modern Social Problems                                                                                                                                                                               | Charles Abram Ellwood              | 1910                | Non-Fictional |
| 304 | The Theory of the Leisure Class                                                                                                                                                                                    | Thorstein Veblen                   | 1899                | Non-Fictional |
| 305 | An Historical View of the Philippine Islands, Vol 1 (of 2): Exhibiting their discovery, population, language, government, manners, customs, productions and commerce.                                              | Joaquin Martinez De Zugniga        | 1814                | Non-Fictional |
| 306 | An Historical View of the Philippine Islands, Vol 2 (of 2): Exhibiting their discovery, population, language, government, manners, customs, productions and commerce.                                              | Joaquin Martinez De Zugniga        | 1814                | Non-Fictional |
| 307 | History of the Buccaneers of America                                                                                                                                                                               | James Burney                       | 1816                | Non-Fictional |
| 308 | The Natural History of Cage Birds: Their Management, Habits, Food, Diseases, Treatment, Breeding, and the Methods of Catching Them.                                                                                | Johann Matthäus Bechstein          | 1838                | Non-Fictional |
| 309 | A System of Pyrotechny: Comprehending the theory and practice, with the application of chemistry; designed for exhibition and for war.                                                                             | James Cutbush                      | 1825                | Non-Fictional |
| 310 | The History of the Inquisition of Spain from the Time of its Establishment to the Reign of Ferdinand VII.                                                                                                          | Juan Antonio Llorente              | 1825                | Non-Fictional |
| 311 | History, Manners, and Customs of the Indian Nations Who Once Inhabited Pennsylvania and the Neighbouring States.                                                                                                   | John Gottlieb Ernestus Heckewelder | 1818                | Non-Fictional |
| 312 | On The Principles of Political Economy, and Taxation                                                                                                                                                               | David Ricardo                      | 1819                | Non-Fictional |
| 313 | Pedestrianism; or, An Account of the Performances of Celebrated Pedestrians During the Last and Present Century.: With a full narrative of Captain Barclay's public and private matches; and an essay on training. | Walter Thom                        | 1813                | Non-Fictional |
| 314 | The Grounds of Christianity Examined by Comparing The New Testament with the Old                                                                                                                                   | George Bethune English             | 1813                | Non-Fictional |
| 315 | An Account of The Kingdom of Nepal: And of the Territories Annexed to this Dominion by the House of Gorkha                                                                                                         | Francis Hamilton                   | 1819                | Non-Fictional |
| 316 | The Logic of Hegel                                                                                                                                                                                                 | Georg Wilhelm Friedrich Hegel      | 1812                | Non-Fictional |
| 317 | Hegel's Philosophy of Mind                                                                                                                                                                                         | Georg Wilhelm Friedrich Hegel      | 1817                | Non-Fictional |
| 318 | A Historical Survey of the Customs, Habits, & Present State of the Gypsies                                                                                                                                         | John Hoyland                       | 1816                | Non-Fictional |
| 319 | Not Paul, But Jesus                                                                                                                                                                                                | Jeremy Bentham                     | 1823                | Non-Fictional |
| 320 | Aids to Reflection; and, The Confessions of an Inquiring Spirit                                                                                                                                                    | Samuel Taylor Coleridge            | 1825                | Non-Fictional |
| 321 | The Dance of Death: Exhibited in Elegant Engravings on Wood with a Dissertation on the Several Representations of that Subject but More Particularly on Those Ascribed to Macaber and Hans Holbein                 | Francis Douce                      | 1833                | Non-Fictional |

Continued on next page

Table S1 – Continued from previous page

|     | Title                                                                                                                                                                                                                                                                                                             | Author(s)                 | Year of Publication | Category      |
|-----|-------------------------------------------------------------------------------------------------------------------------------------------------------------------------------------------------------------------------------------------------------------------------------------------------------------------|---------------------------|---------------------|---------------|
| 322 | Definitions in Political Economy,: Preceded by an Inquiry Into the Rules which Ought to Guide Political Economists in the Definition and Use of Their Terms; with Remarks on the Deviation from These Rules in Their Writings                                                                                     | Thomas Robert Malthus     | 1853                | Non-Fictional |
| 323 | Cottage Economy, to Which is Added The Poor Man's Friend                                                                                                                                                                                                                                                          | William Cobbett           | 1833                | Non-Fictional |
| 324 | Indian Nullification of the Unconstitutional Laws of Massachusetts Relative to the Marshpee Tribe: Or, the Pretended Riot Explained                                                                                                                                                                               | William Apess             | 1835                | Non-Fictional |
| 325 | Slavery                                                                                                                                                                                                                                                                                                           | William Ellery Channing   | 1835                | Non-Fictional |
| 326 | Thoughts on Missions                                                                                                                                                                                                                                                                                              | Sheldon Dibble            | 1850                | Non-Fictional |
| 327 | A Portraiture of Quakerism, Volume 2: Taken from a View of the Education and Discipline, Social Manners, Civil and Political Economy, Religious Principles and Character, of the Society of Friends                                                                                                               | Thomas Clarkson           | 1841                | Non-Fictional |
| 328 | The Field Book: or, Sports and pastimes of the United Kingdom: compiled from the best authorities, ancient and modern                                                                                                                                                                                             | William Hamilton Maxwell  | 1833                | Non-Fictional |
| 329 | Cosmos: A Sketch of a Physical Description of the Universe                                                                                                                                                                                                                                                        | Frédéric Bastiat          | 1853                | Non-Fictional |
| 330 | Elements of Physiophilosophy                                                                                                                                                                                                                                                                                      | Lorenz Oken               | 1847                | Non-Fictional |
| 331 | A Synopsis of the Birds of North America                                                                                                                                                                                                                                                                          | Alexander von Humboldt    | 1845                | Non-Fictional |
| 332 | The Practical Astronomer: Comprising illustrations of light and colours—practical descriptions of all kinds of telescopes—the use of the equatorial-transit—circular, and other astronomical instruments, a particular account of the Earl of Rosse's large telescopes, and other topics connected with astronomy | Thomas Dick               | 1850                | Non-Fictional |
| 333 | The Gastronomic Regenerator: A Simplified and Entirely New System of Cookery: With Nearly Two Thousand Practical Receipts Suited to the Income of All Classes                                                                                                                                                     | Alexis Soyer              | 1846                | Non-Fictional |
| 334 | The Pantropheon; Or, History of Food, Its Preparation, from the Earliest Ages of the World                                                                                                                                                                                                                        | Alexis Soyer              | 1850                | Non-Fictional |
| 335 | Miss Leslie's New Cookery Book                                                                                                                                                                                                                                                                                    | Eliza Leslie              | 1867                | Non-Fictional |
| 336 | Conversations on Chemistry, V. 1-2: In Which the Elements of that Science Are Familiarly Explained and Illustrated by Experiments                                                                                                                                                                                 | Jane Haldimand Marcet     | 1847                | Non-Fictional |
| 337 | Conversations on Natural Philosophy, in which the Elements of that Science are Familiarly Explained                                                                                                                                                                                                               | Jane Haldimand Marcet     | 1836                | Non-Fictional |
| 338 | Botany for Ladies: or, A Popular Introduction to the Natural System of Plants, According to the Classification of De Candolle.                                                                                                                                                                                    | Jane Loudon               | 1815                | Non-Fictional |
| 339 | American Institutions and Their Influence                                                                                                                                                                                                                                                                         | Alexis de Tocqueville     | 1851                | Non-Fictional |
| 340 | The Steam Engine Explained and Illustrated (Seventh Edition): With an Account of Its Invention and Progressive Improvement, and Its Application to Navigation and Railways; Including Also a Memoir of Watt                                                                                                       | Dionysius Lardner         | 1840                | Non-Fictional |
| 341 | History of the State of California: From the Period of the Conquest by Spain to Her Occupation by the United States of America                                                                                                                                                                                    | John Frost                | 1851                | Non-Fictional |
| 342 | History of the Conquest of Mexico; vol. 3/4                                                                                                                                                                                                                                                                       | William Hickling Prescott | 1857                | Non-Fictional |
| 343 | Norman's New Orleans and Environs: Containing a Brief Historical Sketch of the Territory and State of Louisiana and the City of New Orleans, from the Earliest Period to the Present Time                                                                                                                         | Benjamin Moore Norman     | 1842                | Non-Fictional |
| 344 | The Philosophy of Health; Volume 1 (of 2): or, an exposition of the physical and mental constitution of man                                                                                                                                                                                                       | Southwood Smith           | 1847                | Non-Fictional |
| 345 | History of Brighthelmston; or, Brighton as I View it and Others Knew It: With a Chronological Table of Local Events                                                                                                                                                                                               | John Ackerson Erredge     | 1851                | Non-Fictional |

Continued on next page



Table S1 – Continued from previous page

|     | Title                                                                                                                                                                                                     | Author(s)                   | Year of Publication | Category      |
|-----|-----------------------------------------------------------------------------------------------------------------------------------------------------------------------------------------------------------|-----------------------------|---------------------|---------------|
| 346 | Summary Narrative of an Exploratory Expedition to the Sources of the Mississippi River, in 1820: Resumed and Completed, by the Discovery of its Origin in Itasca Lake, in 1832                            | Henry Rowe Schoolcraft      | 1836                | Non-Fictional |
| 347 | The Infant System: For Developing the Intellectual and Moral Powers of all Children, from One to Seven years of Age                                                                                       | Samuel Wilderspin           | 1850                | Non-Fictional |
| 348 | Bulfinch's Mythology: The Age of Fable; The Age of Chivalry; Legends of Charlemagne                                                                                                                       | Thomas Bulfinch             | 1862                | Non-Fictional |
| 349 | Dealings with the Dead, Volume 2 (of 2)                                                                                                                                                                   | Lucius Manlius Sargent      | 1846                | Non-Fictional |
| 350 | Science for the School and Family, Part I. Natural Philosophy                                                                                                                                             | Worthington Hooker          | 1853                | Non-Fictional |
| 351 | On the various forces of nature and their relations to each other                                                                                                                                         | Michael Faraday             | 1847                | Non-Fictional |
| 352 | British Bees: An Introduction into the Studies of the Natural History and Economy of the Bees Indigenous to the British Isles                                                                             | William Edward Shuckard     | 1859                | Non-Fictional |
| 353 | Gunnery in 1858: Being a Treatise on Rifles, Cannon, and Sporting Arms: Explaining the Principles of the Science of Gunnery, and Describing the Newest Improvements in Fire-Arms                          | William Greener             | 1846                | Non-Fictional |
| 354 | The Sabbath-School Index: Pointing out the history and progress of Sunday-schools, with approved modes of instruction.                                                                                    | Richard Gay Pardee          | 1842                | Non-Fictional |
| 355 | The Opium Habit                                                                                                                                                                                           | Horace B. Day               | 1860                | Non-Fictional |
| 356 | History of Greece, Volume 12 (of 12)                                                                                                                                                                      | George Grote                | 1844                | Non-Fictional |
| 357 | History of Greece, Volume 03 (of 12)                                                                                                                                                                      | George Grote                | 1852                | Non-Fictional |
| 358 | History of Greece, Volume 05 (of 12)                                                                                                                                                                      | George Grote                | 1852                | Non-Fictional |
| 359 | History of Greece, Volume 04 (of 12)                                                                                                                                                                      | George Grote                | 1838                | Non-Fictional |
| 360 | Reflections on the Decline of Science in England, and on Some of Its Causes                                                                                                                               | Charles Babbage             | 1857                | Non-Fictional |
| 361 | On the Connexion of the Physical Sciences                                                                                                                                                                 | Mary Somerville             | 1880                | Non-Fictional |
| 362 | Knowledge Is Power:: A View of the Productive Forces of Modern Society and the Results of Labor, Capital and Skill.                                                                                       | Charles Knight              | 1825                | Non-Fictional |
| 363 | Athens: Its Rise and Fall, Book II                                                                                                                                                                        | Edward George Bulwer-Lytton | 1870                | Non-Fictional |
| 364 | A Popular History of England, From the Earliest Times to the Reign of Queen Victoria; Vol. I                                                                                                              | François Guizot             | 1837                | Non-Fictional |
| 365 | Elements of Agricultural Chemistry                                                                                                                                                                        | Thomas Anderson             | 1852                | Non-Fictional |
| 366 | Practical Guide to English Versification: With a Compendious Dictionary of Rhymes, an Examination; of Classical Measures, and Comments Upon Burlesque and; Comic Verse, Vers de Société, and Song-writing | Tom Hood                    | 1838                | Non-Fictional |
| 367 | A Manual of Elementary Geology: or, The Ancient Changes of the Earth and its Inhabitants as Illustrated by Geological Monuments                                                                           | Sir Charles Lyell           | 1844                | Non-Fictional |
| 368 | Health and Education                                                                                                                                                                                      | Charles Kingsley            | 1837                | Non-Fictional |
| 369 | Stones of the Temple; Or, Lessons from the Fabric and Furniture of the Church                                                                                                                             | Walter Field                | 1847                | Non-Fictional |
| 370 | History of the United Netherlands from the Death of William the Silent to the Twelve Year's Truce — Complete (1600-1609)                                                                                  | John Lothrop Motley         | 1849                | Non-Fictional |
| 371 | A Dictionary of English Synonymes and Synonymous or Parallel Expressions: Designed as a Practical Guide to Aptness and Variety of Phraseology                                                             | Richard Soule               | 1838                | Non-Fictional |
| 372 | The Rise of the Dutch Republic — Complete (1566-74)                                                                                                                                                       | John Lothrop Motley         | 1871                | Non-Fictional |
| 373 | A History of Domestic Manners and Sentiments in England During the Middle Ages                                                                                                                            | Thomas Wright               | 1859                | Non-Fictional |
| 374 | The History, Theory, and Practice of Illuminating: Condensed from 'The Art of Illuminating' by the same illustrator and author                                                                            | Matthew Digby Wyatt         | 1860                | Non-Fictional |
| 375 | An Architect's Note-Book in Spain: principally illustrating the domestic architecture of that country.                                                                                                    | Matthew Digby Wyatt         | 1858                | Non-Fictional |
| 376 | History of Lace                                                                                                                                                                                           | Fanny Bury Palliser         | 1862                | Non-Fictional |

*Continued on next page*

Table S1 – Continued from previous page

|     | <b>Title</b>                                                                                                                                                                                                                         | <b>Author(s)</b>       | <b>Year of Publication</b> | <b>Category</b> |
|-----|--------------------------------------------------------------------------------------------------------------------------------------------------------------------------------------------------------------------------------------|------------------------|----------------------------|-----------------|
| 377 | The Physical Basis of Mind: Being the Second Series of Problems of Life and Mind.                                                                                                                                                    | George Henry Lewes     | 1853                       | Non-Fictional   |
| 378 | Lectures on the rise and development of medieval architecture; vol. 2                                                                                                                                                                | George Gilbert Scott   | 1872                       | Non-Fictional   |
| 379 | The History of Ancient America, Anterior to the Time of Columbus: Proving the Identity of the Aborigines with the Tyrians and Israelites; and the Introduction of Christianity into the Western Hemisphere By The Apostle St. Thomas | George Jones           | 1838                       | Non-Fictional   |
| 380 | The Subterranean World                                                                                                                                                                                                               | Georg Hartwig          | 1871                       | Non-Fictional   |
| 381 | Guano: A Treatise of Practical Information for Farmers                                                                                                                                                                               | Solon Robinson         | 1852                       | Non-Fictional   |
| 382 | Wild Wales: The People, Language, & Scenery                                                                                                                                                                                          | George Borrow          | 1862                       | Non-Fictional   |
| 383 | History of Indian and Eastern Architecture                                                                                                                                                                                           | James Fergusson        | 1876                       | Non-Fictional   |
| 384 | Parasites: A Treatise on the Entozoa of Man and Animals: Including Some Account of the Ectozoa                                                                                                                                       | Thomas Spencer Cobbold | 1879                       | Non-Fictional   |
| 385 | History of American Socialisms                                                                                                                                                                                                       | John Humphrey Noyes    | 1869                       | Non-Fictional   |
| 386 | London Labour and the London Poor, Vol. 2                                                                                                                                                                                            | Henry Mayhew           | 1851                       | Non-Fictional   |
| 387 | Companion to the Bible                                                                                                                                                                                                               | Elijah Porter Barrows  | 1867                       | Non-Fictional   |
| 388 | The Non-religion of the Future: A Sociological Study                                                                                                                                                                                 | Jean-Marie Guyau       | 1887                       | Non-Fictional   |
| 389 | Ten Great Religions: An Essay in Comparative Theology                                                                                                                                                                                | James Freeman Clarke   | 1871                       | Non-Fictional   |
| 390 | A History of Oregon, 1792-1849: Drawn From Personal Observation and Authentic Information                                                                                                                                            | William Henry Gray     | 1870                       | Non-Fictional   |
| 391 | Bible Animals:: Being a Description of Every Living Creature Mentioned in the Scripture, from the Ape to the Coral.                                                                                                                  | John George Wood       | 1869                       | Non-Fictional   |

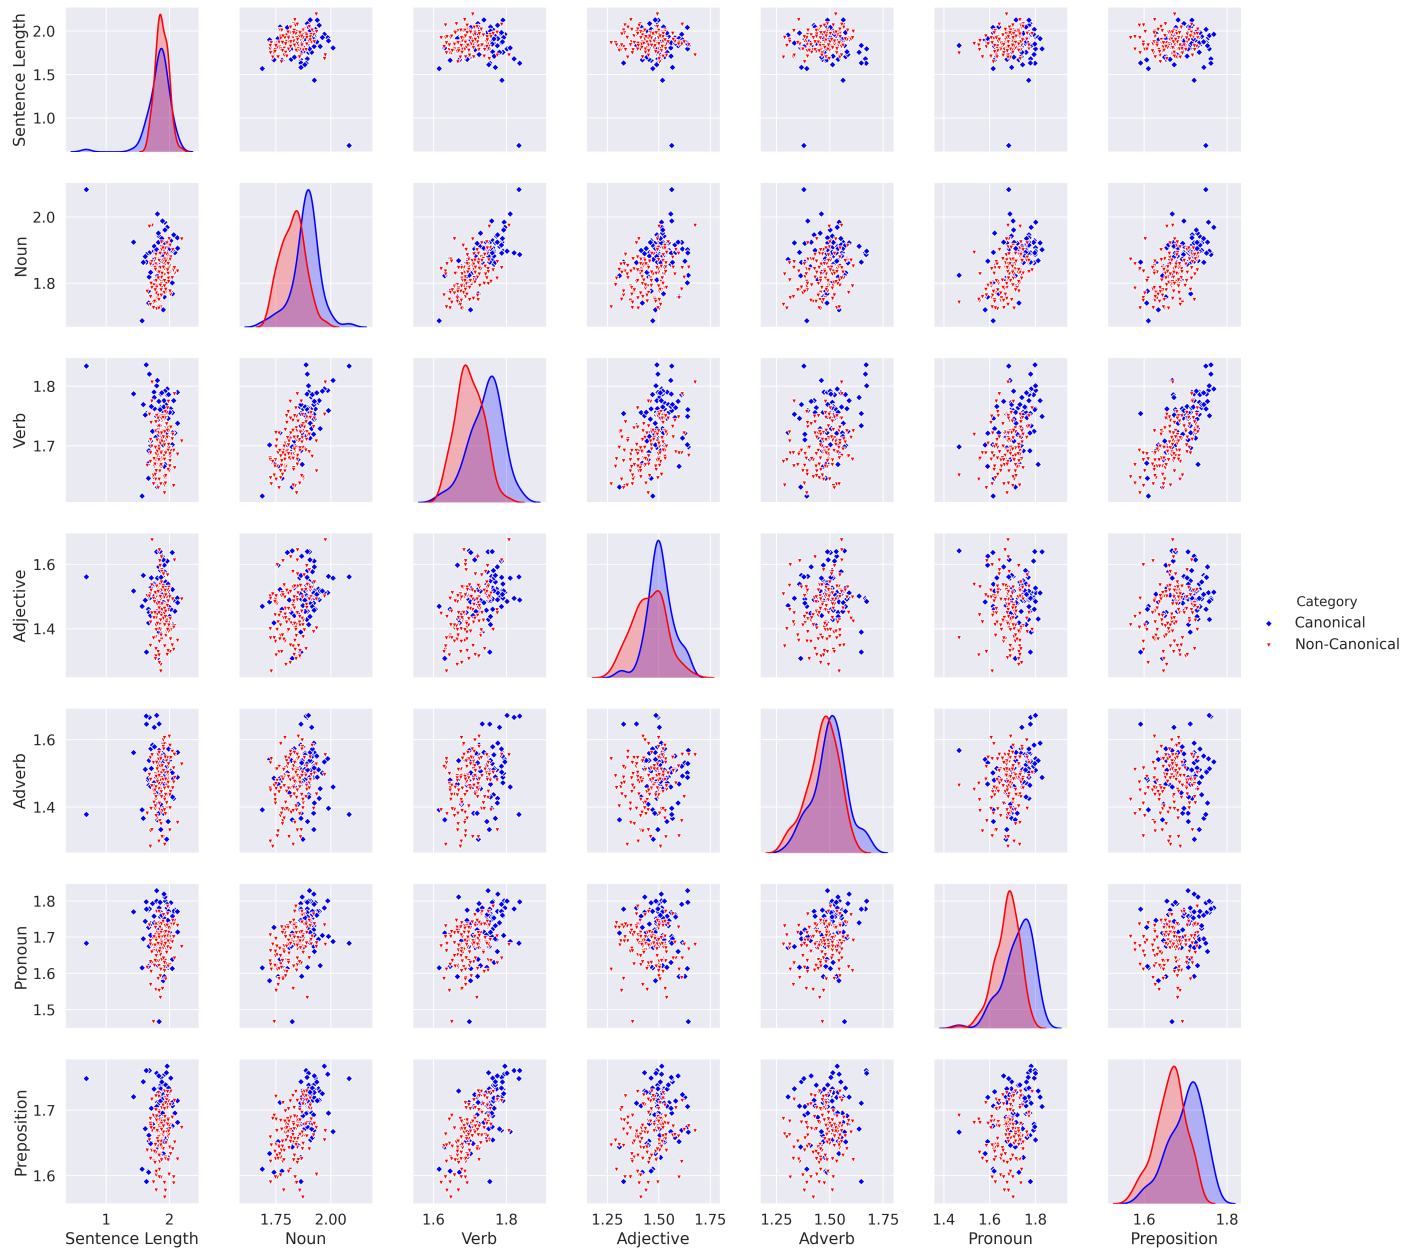

**Figure S1.** Pair-plot of all Approximate Entropy (ApEn) features in fictional/canonical and fictional/non-canonical texts. While each non-diagonal plot shows the relationships between two features, the main-diagonal subplots visualize the univariate distributions of each feature.

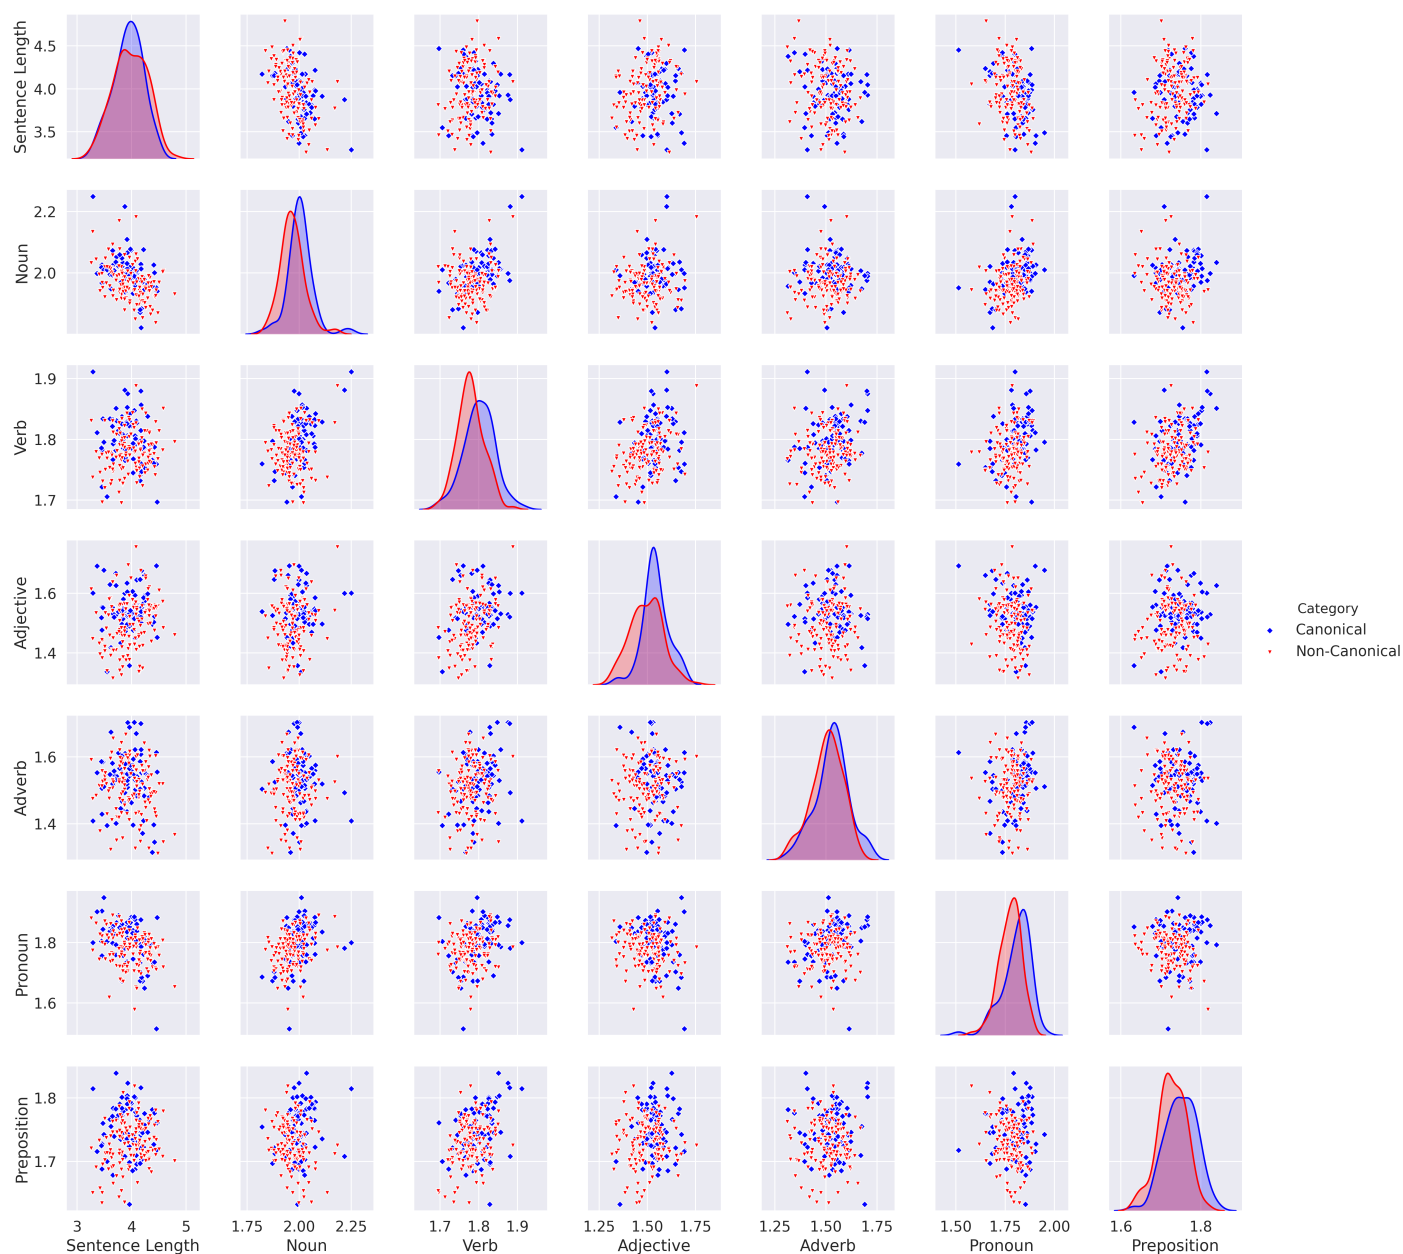

**Figure S2.** Pair-plot of all Shannon Entropy (ShEn) features in fictional/canonical and fictional/non-canonical texts. While each non-diagonal plot shows the relationships between two features, the main-diagonal subplots visualize the univariate distributions of each feature.

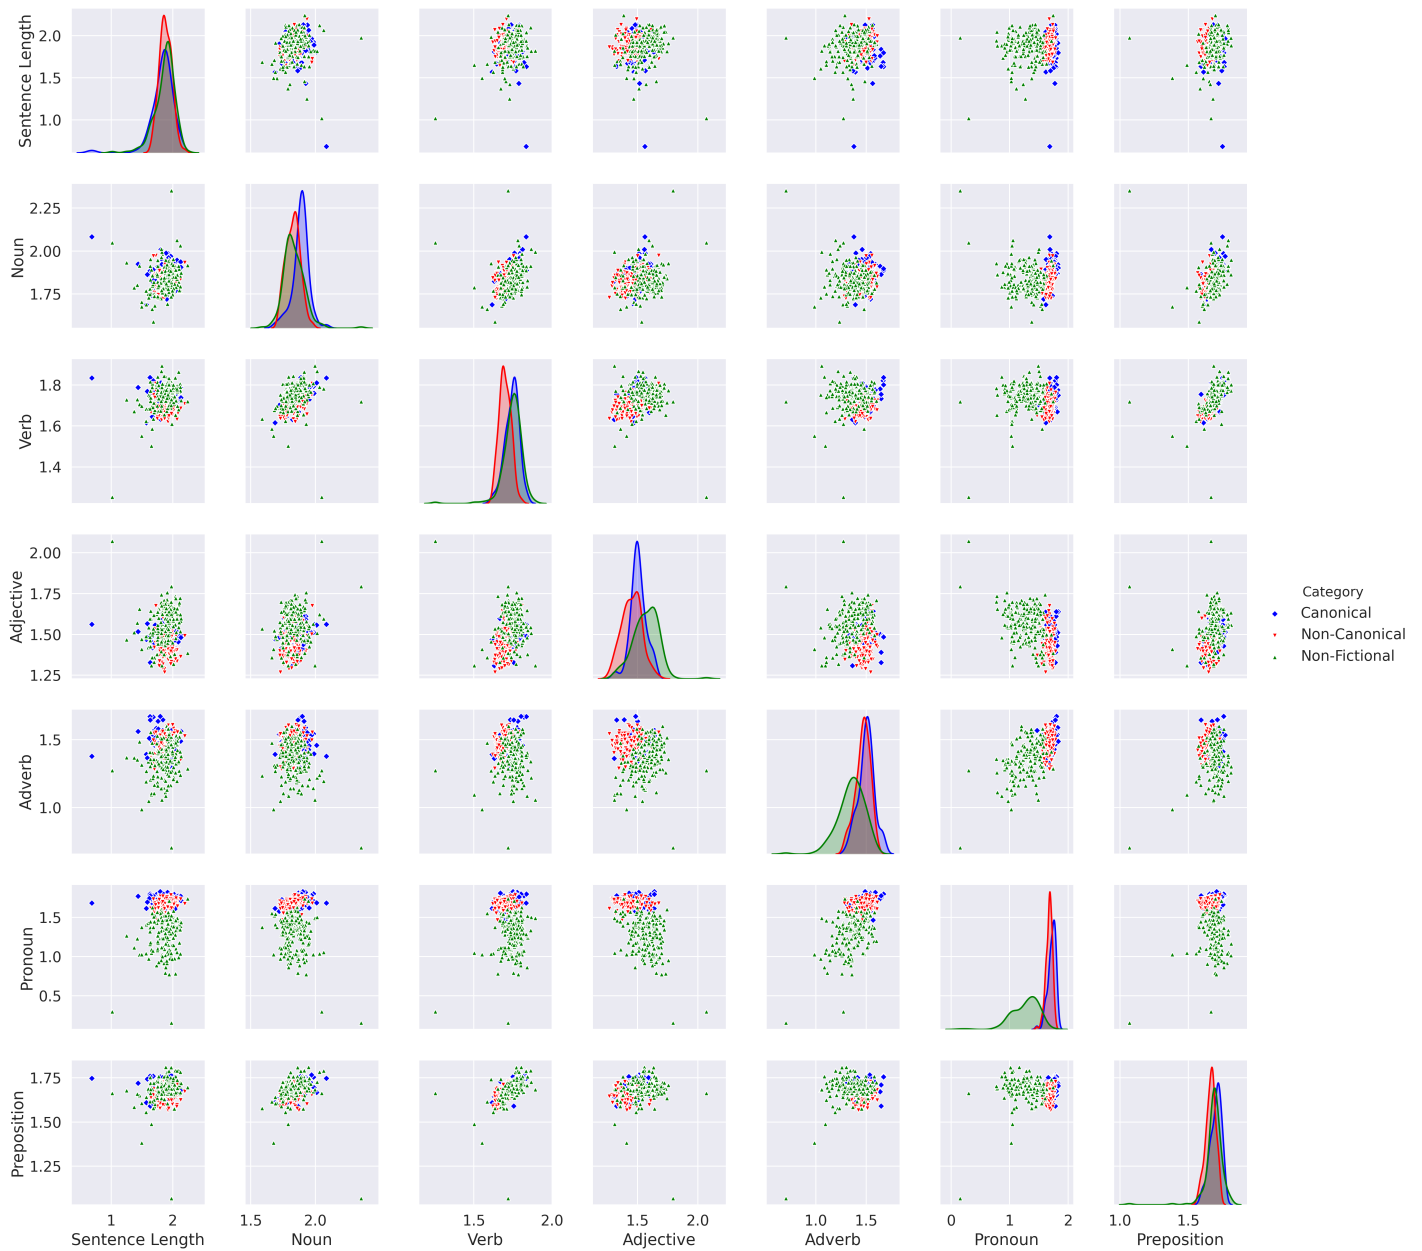

**Figure S3.** Pair-plot of all Approximate Entropy (ApEn) features in fictional/canonical, fictional/non-canonical and non-fictional texts. For better visibility of the data for canonical texts vs. non-canonical texts, see Figure S1. While each non-diagonal plot shows the relationships between two features, the main-diagonal subplots visualize the univariate distributions of each feature.

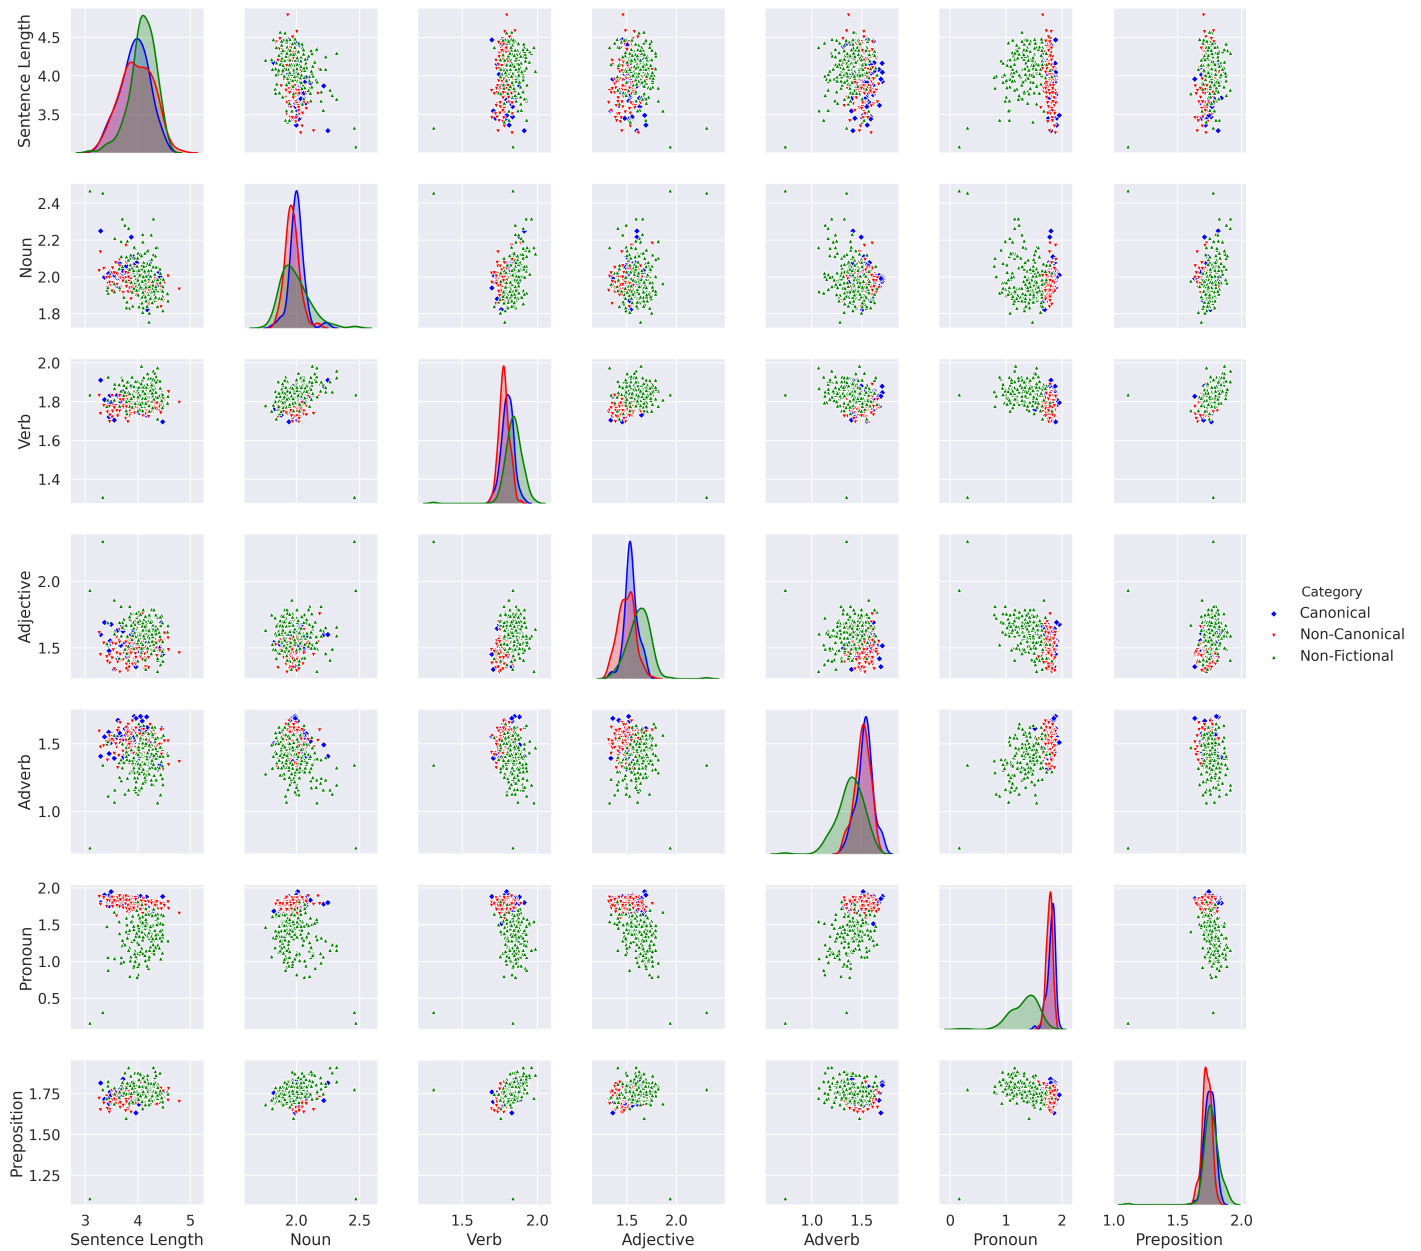

**Figure S4.** Pair-plot of all Shannon Entropy (ShEn) features in fictional/canonical, fictional/non-canonical and non-fictional texts. For better visibility of the data for canonical texts vs. non-canonical texts, see Figure S2. While each non-diagonal plot shows the relationships between two features, the main-diagonal subplots visualize the univariate distributions of each feature.

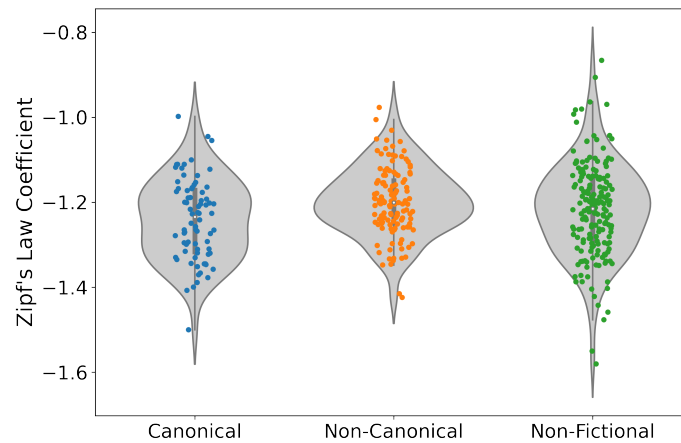

**Figure S5.** Zipf's law coefficient (lambda) of fictional/canonical, fictional/non-canonical and non-fictional texts. The high overlap of values between the text categories results in a poor classification accuracy.

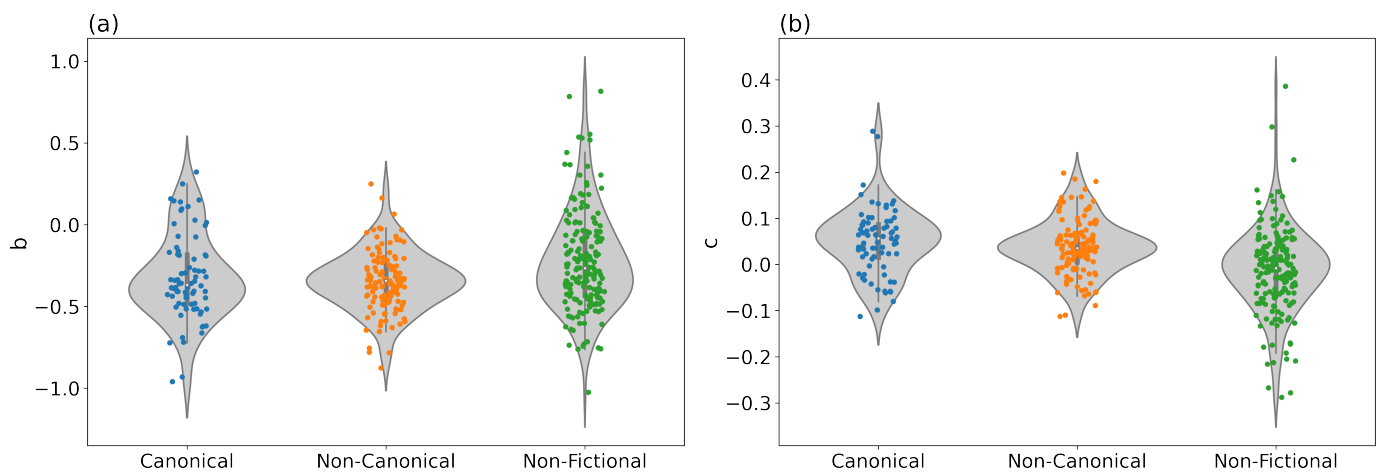

**Figure S6.** Menzerath–Altmann law assumes a relation between the size of constituents,  $y$ , of a linguistic construct with the size of the construct,  $x$ :  $y = ax^be^{-cx}$ . The plots in (a) and (b) represent the two parameters of the Manzerath-Altmann law,  $b$  and  $c$ , respectively, in fictional/canonical, fictional/non-canonical and non-fictional texts.

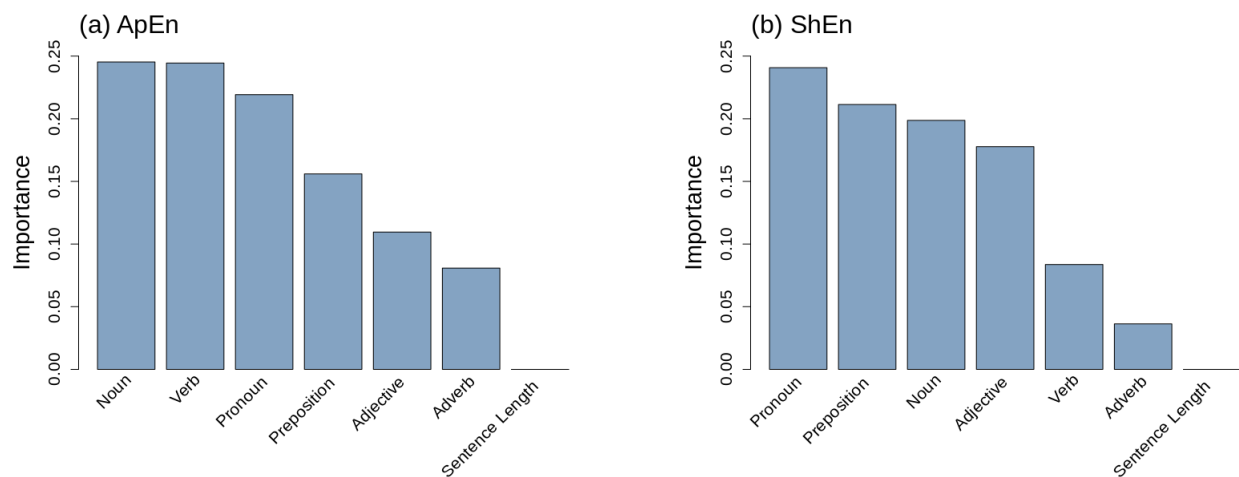

**Figure S7.** Sensitivity analysis of ApEn features (a) and ShEn features (b) in classification of fictional/canonical and fictional/non-canonical texts.

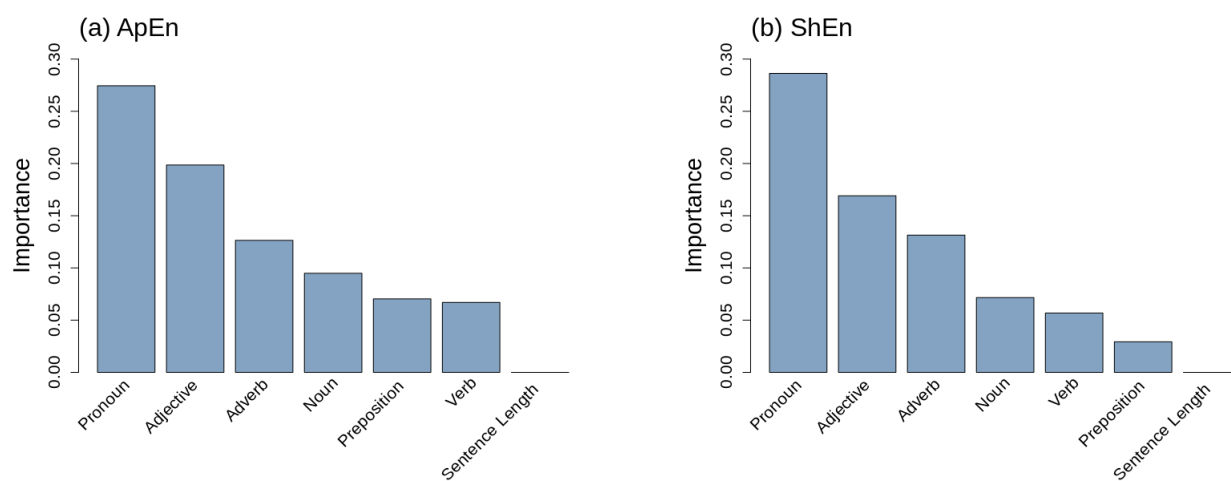

**Figure S8.** Sensitivity analysis of ApEn features (a) and ShEn features (b) in classification of fictional and non-fictional texts.
